# Supplementary material
Source: PubMed Central journal article supplement (PMC3059034)
Supplement: supp_M110.210807_jbc.M110.210807-1.pdf [file supp_M110.210807_jbc.M110.210807-1.pdf]

Table S1. Quantitative RT-PCR primer sequences.

| <b>Transcript</b> | <b>Primer 1</b>               | <b>Primer 2</b>                |
|-------------------|-------------------------------|--------------------------------|
| <i>36B4</i>       | 5'-TGCTGAACATCTCCCCCTTCTC-3'  | 5'-TCTCCACAGACAATGCCAGGAC-3'   |
| <i>Igfbp1</i>     | 5'-TGTACCAGAACCTGCTGCAC-3'    | 5'-CATGCTGCTATAGGTGCTGATG-3'   |
| <i>Srebf1</i>     | 5'-GAAGCTGTCTGGGGTAGCGTCT-3'  | 5'-CTCTCAGGAGAGTTGGCACCTG-3'   |
| <i>Fasn</i>       | 5'-GCTGCGGAAACTTCAGGAAAT-3'   | 5'-AGAGACGTGTCACTCCTGGACTT-3'  |
| <i>Acaca</i>      | 5'-GGACAGACTGATCGCAGAGAAAG-3' | 5'-GCTGTTCCCTCAGGCTCACAT-3'    |
| <i>Ppara</i>      | 5'-GGGTACCACTACGGAGTTCACG-3'  | 5'-CAGACAGGCACTTGTGAAAACG-3'   |
| <i>Cpt1a</i>      | 5'-TGCACTACGGAGTCCTGCAA-3'    | 5'-GGACAACCTCCATGGCTCAG-3'     |
| <i>Acox1</i>      | 5'-GTGCAGCTCAGAGTCTGTCCAA-3'  | 5'-TACTGCTGCGTCTGAAAATCCA-3'   |
| <i>F4/80</i>      | 5'-CTTTGGCTATGGGCTTCCAGTC-3'  | 5'-GCAAGGAGGACAGAGTTTATCGTG-3' |
| <i>Tnfa</i>       | 5'-CCAGACCCTCACACTCAGATCA-3'  | 5'-CACTTGGTGGTTTGCTACGAC-3'    |
